# Supplementary material for: The application of transition metal sulfide Ni3S4/CNFs in rechargeable Ni–Zn batteries
Source: Royal Society of Chemistry journal article supplement (doi:10.1039/d1nj03768d), 2021-01-01
Supplement: d1nj03768d1.pdf [file d1nj03768d1.pdf]

**Fig. S1** The XPS spectra of Ni<sub>3</sub>S<sub>4</sub>/CNFs in the region of O 1s.

**Fig. S2** (a) The discharge time of single electrode at 5 A g<sup>-1</sup> and (b) cycle performance of Ni-Zn batteries with different contents of CNFs at current density of 5 A g<sup>-1</sup>.

**Fig. S3** (a) The discharge time of single electrode at 5 A g<sup>-1</sup> and (b) the cycle performance of Ni<sub>3</sub>S<sub>4</sub>/CNFs//Zn, Ni<sub>3</sub>S<sub>4</sub>-CNFs//Zn and Ni<sub>3</sub>S<sub>4</sub>//Zn at the current density of 5 A g<sup>-1</sup>.

**Fig. S4** The cycle performance curves of Ni<sub>3</sub>S<sub>4</sub>/CNFs//Zn and Ni<sub>3</sub>S<sub>4</sub>/CNFs-without G//Zn at current density of 5 A g<sup>-1</sup>

**Fig. S5** The photo of disassembling from Ni<sub>3</sub>S<sub>4</sub>/CNFs//Zn and Ni<sub>3</sub>S<sub>4</sub>-CNFs//Zn SEM micrographs of (b) Zn electrode; (c) cathode electrode of Ni<sub>3</sub>S<sub>4</sub>/CNFs and (e) Zn electrode; (f) cathode electrode of Ni<sub>3</sub>S<sub>4</sub>-CNFs after 100 cycles.

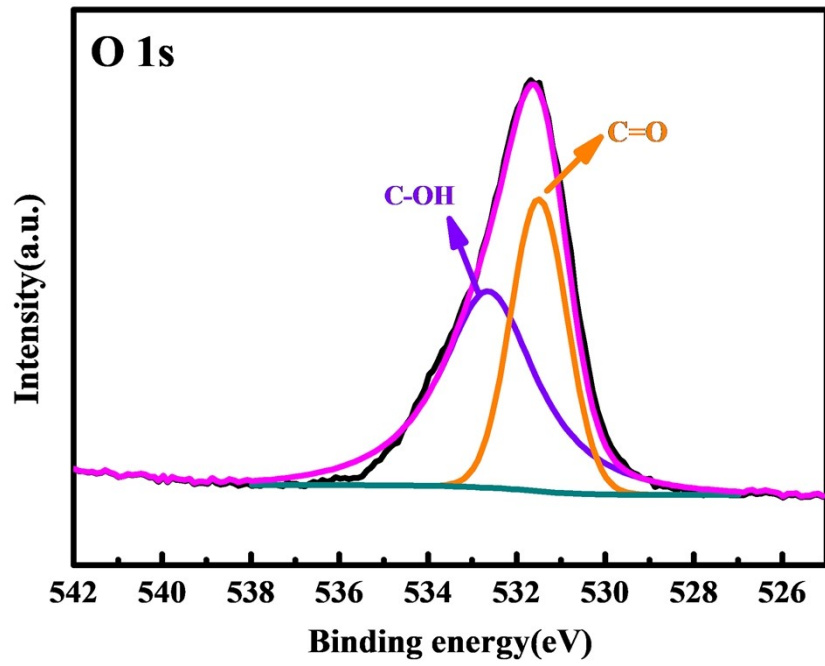

**Fig. S1** The XPS spectra of Ni<sub>3</sub>S<sub>4</sub>/CNFs in the region of O 1s.

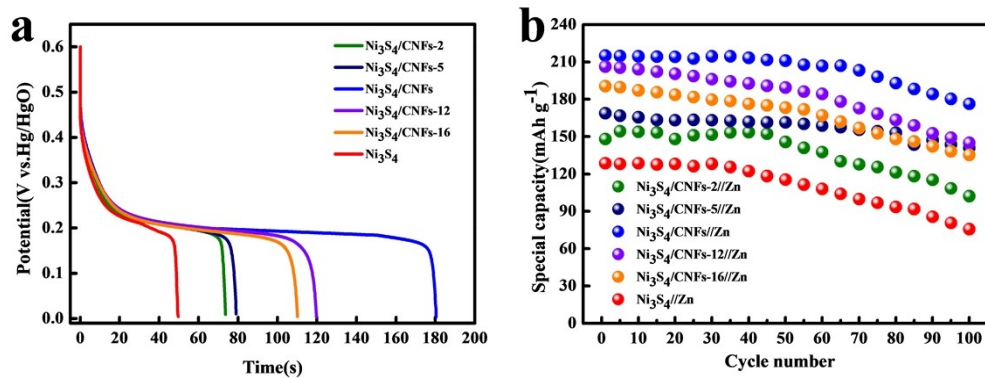

**Fig. S2** (a) The discharge time of single electrode at 5 A g<sup>-1</sup> and (b) cycle performance of Ni-Zn batteries with different contents of CNFs at current density of 5 A g<sup>-1</sup>.

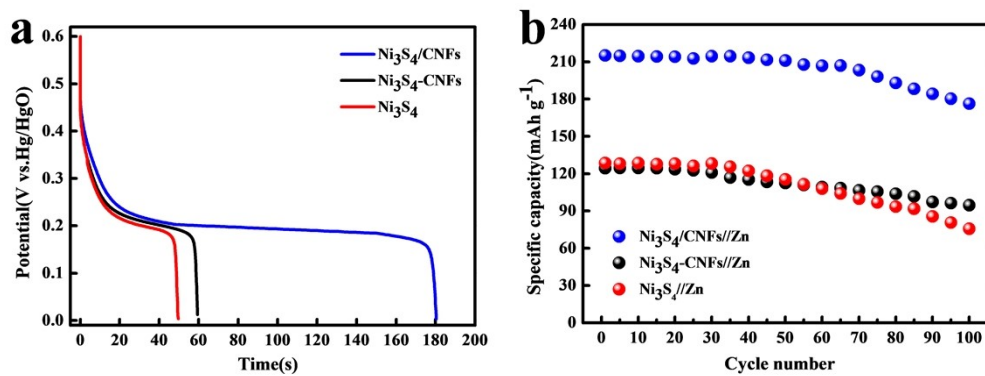

**Fig. S3** (a) The discharge time of single electrode at 5 A g<sup>-1</sup> and (b) the cycle performance of Ni<sub>3</sub>S<sub>4</sub>/CNFs//Zn, Ni<sub>3</sub>S<sub>4</sub>-CNFs//Zn and Ni<sub>3</sub>S<sub>4</sub>//Zn at the current density of 5 A g<sup>-1</sup>.

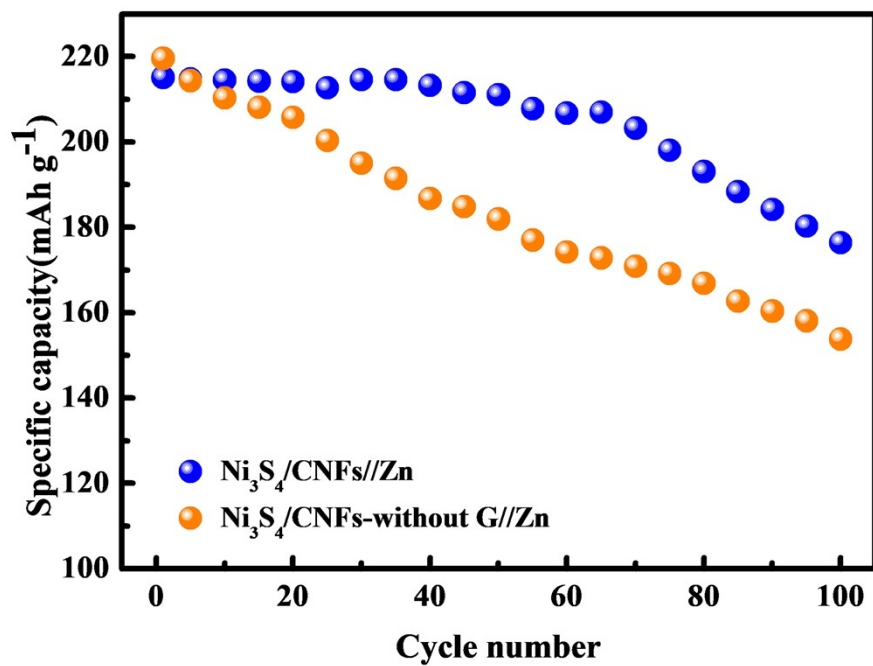

**Fig. S4** The cycle performance curves of Ni<sub>3</sub>S<sub>4</sub>/CNFs//Zn and Ni<sub>3</sub>S<sub>4</sub>/CNFs-without G//Zn at current density of 5 A g<sup>-1</sup>

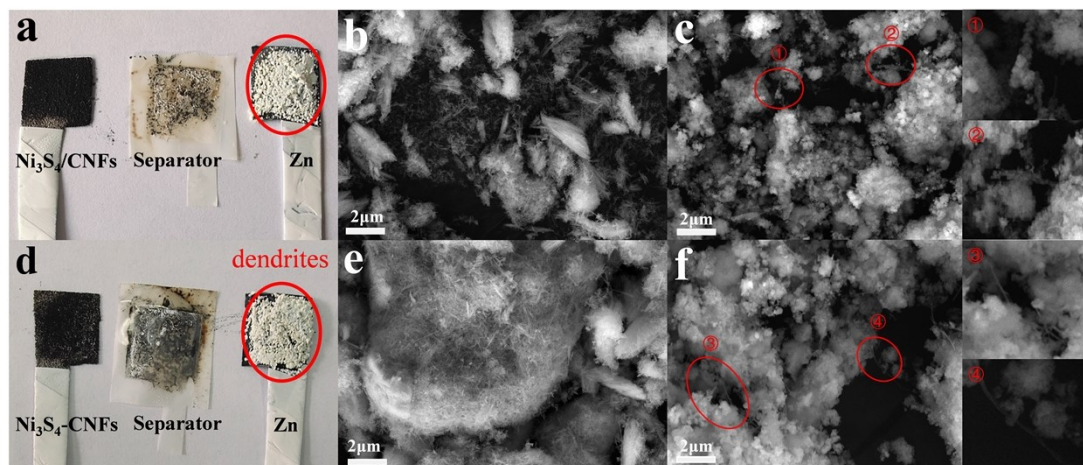

**Fig. S5** The photo of disassembling from  $\text{Ni}_3\text{S}_4/\text{CNFs}/\text{Zn}$  and  $\text{Ni}_3\text{S}_4\text{-CNFs}/\text{Zn}$  SEM micrographs of (b) Zn electrode; (c) cathode electrode of  $\text{Ni}_3\text{S}_4/\text{CNFs}$  and (e) Zn electrode; (f) cathode electrode of  $\text{Ni}_3\text{S}_4\text{-CNFs}$  after 100 cycles.
